# Supplementary material for: Endogenous complement human serum bactericidal assay (enc-hSBA) for vaccine effectiveness assessments against meningococcal serogroup B
Source: PubMed Central journal article supplement (PMC7902841; doi:10.1038/s41541-021-00286-8), 2021-02-23
Supplement: 41541_2021_286_MOESM1_ESM.pdf [file 41541_2021_286_MOESM1_ESM.pdf]

## 1 **Supplementary Material**

### 2 **Note 1. Intermediate precision results**

3 The variability of bacterial counts was evaluated across dilution ranges, in qualification  
4 experiments. All inconclusive and invalid results from the consistency experiments were  
5 removed such that exactly 12 individual bacterial counts (expressed as proportions of the  
6 CFU counts at T0) were available, for each sample (3 tests x 2 replicates x 2 dilutions). By  
7 analyzing the distribution of bacterial counts with dilution, by titer, it was observed that  
8 variances increase with bacterial count. In order to assess the impact of the variability on the  
9 range of inconclusive results around 50% bacterial survival, the average bacterial count  
10 across all 6 available results per sample was calculated as the best estimate of the “true”  
11 bacterial count, and the 6 individual results were represented versus the 6-fold average  
12 **(Supplementary Fig. 1)**. According to this representation, samples with an average bacterial  
13 count around 20% or lower are consistently classified negative, while samples with a  
14 bacterial count around 80% or higher are consistently classified positive. Based on the  
15 standard deviation (1.2) estimated as the Root Mean-Squared Error (RMSE) from the linear  
16 regression, a sample with an average bacterial count of 50% is expected to show a bacterial  
17 count between 26% and 81% in 90% of an assumed large number of repeated  
18 measurements.

19 **Supplementary Fig. 1.** Visualization of individual bacterial count values versus average  
20 count calculated across 6 determinations (performed on square root-transformed data)

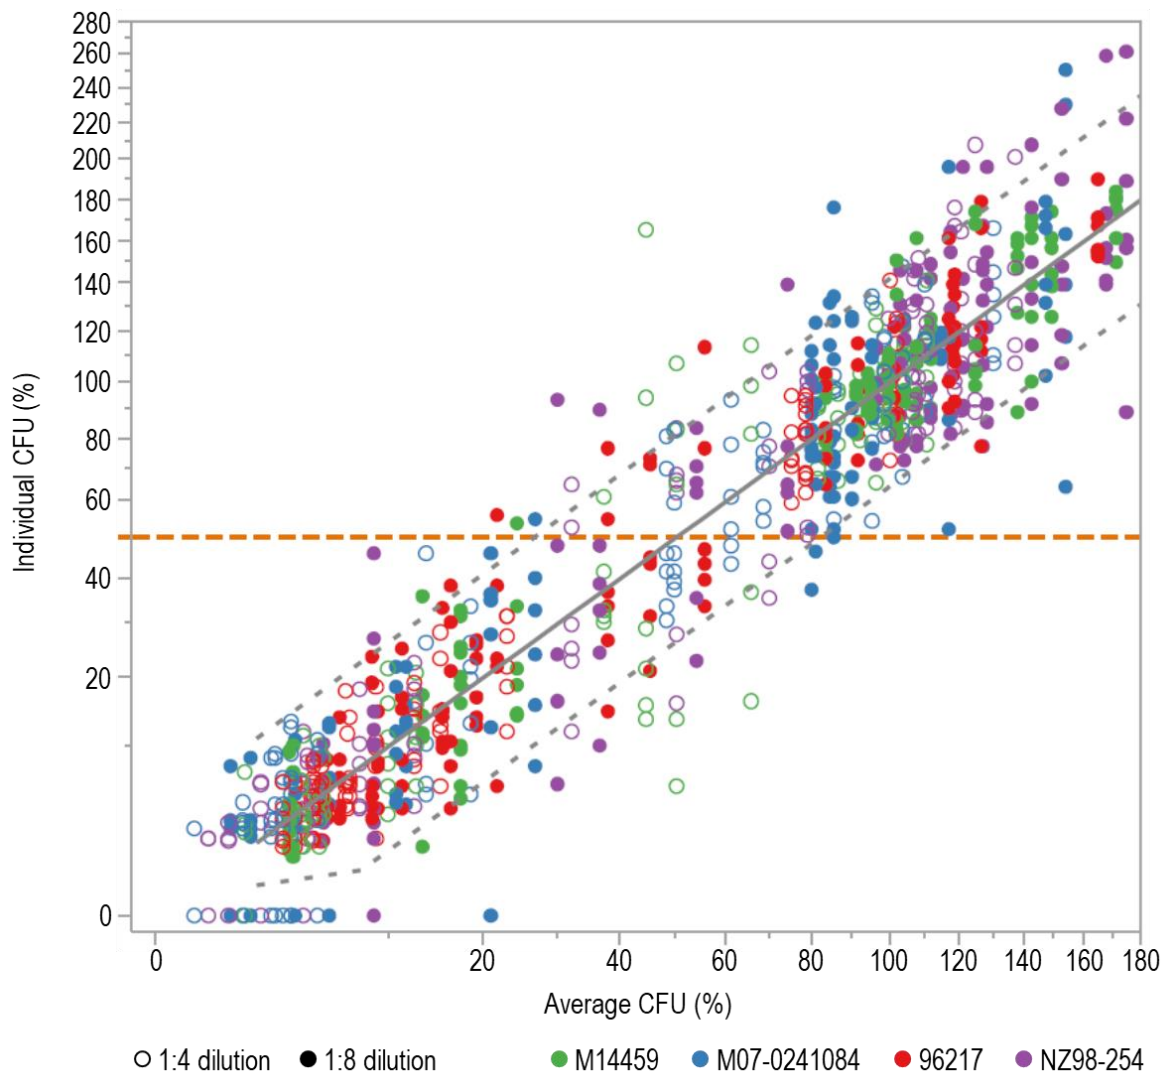

21

22 CFU, colony forming units.

23 Note: The solid and dashed lines show a linear regression with 2-sided 90% prediction

24 bands, respectively.

25 **Supplementary Table 1.** Origin of serum samples used in the validation/qualification of enc-  
 26 hSBA

| Experiment(s)                                                                 | Source                   | N                     |
|-------------------------------------------------------------------------------|--------------------------|-----------------------|
| Qualification of the 110-strain panel                                         | Study A (NCT01478347)    | 18                    |
|                                                                               | Study B (NCT01911221)    | 12                    |
| Intermediate precision                                                        |                          |                       |
| Pre-vaccination with 4CMenB                                                   | Study D                  | 10                    |
| Post-vaccination with 4CMenB                                                  | Study A (NCT01478347)    | 9                     |
|                                                                               | Marburg blood bank       | 1                     |
| Robustness                                                                    |                          |                       |
| Preservation of complement activity at different sample storage temperaturesa | Study E (NCT02140762)    | 20                    |
| Bacterial grow within the assay range                                         | Study A (NCT01478347)    | 6                     |
|                                                                               | Study D                  | 3                     |
|                                                                               | Marburg blood bank       | 2                     |
| Specificity                                                                   | Study A (NCT01478347)    | 3                     |
|                                                                               | Study B (NCT01911221)    | 1                     |
|                                                                               | Marburg blood bank       | 2                     |
| Sensitivity                                                                   |                          |                       |
| Pre-vaccination with 4CMenB                                                   | Study D                  | 18                    |
| Post-vaccination with 4CMenB                                                  | Study A (NCT01478347)    | 6                     |
|                                                                               | Study C (NCT02305446)    | 5                     |
|                                                                               | MenACWY-positive samples | Study C (NCT02305446) |
|                                                                               | Study D                  | 10                    |
|                                                                               | Marburg blood bank       | 9                     |

27 enc-hSBA, serum bactericidal activity assay using endogenous human complement; N,  
 28 number of serum samples; 4CMenB, 4-component meningococcal serogroup B vaccine;  
 29 MenACWY, serogroup A, C, W, and Y meningococci.
